# Supplementary material for: Development of an Automatic Linear Calibration Method for High Resolution Single Particle Mass Spectrometry: Improved Chemical Species Identification for Atmospheric Aerosols
Source: Copernicus journal article supplement (doi:10.5194/amt-2019-489), 2020-03-09
Supplement: Supplementary file 1 [file amt-2019-489-supplement.pdf]

## Supplementary Material

# Development of an Automatic Linear Calibration Method for High Resolution Single Particle Mass Spectrometry: Improved Chemical Species Identification for Atmospheric Aerosols

*Shengqiang Zhu<sup>1</sup>, Lei Li<sup>2</sup>, Shurong Wang<sup>1</sup>, Mei Li<sup>2</sup>, Yaxi Liu<sup>1</sup>, Xiaohui Lu<sup>1</sup>, Hong Chen<sup>1</sup>, Lin Wang<sup>1,3</sup>, Jianmin Chen<sup>1,3</sup>, Zhou Zhen<sup>2</sup>, Xin Yang<sup>\*1,3</sup> and Xiaofei Wang<sup>\*1,3</sup>*

[1] Shanghai Key Laboratory of Atmospheric Particle Pollution and Prevention, Department of Environmental Science and Engineering, Fudan University, Shanghai 200433, China

[2] Institute of Mass Spectrometer and Atmospheric Environment, Jinan University, Guangzhou, 510632, China

[3] Shanghai Institute of Pollution Control and Ecological Security, Shanghai 200092, China

## Atmospheric Measurement Techniques Discussions

\*To whom correspondence should be addressed.

Correspondence to:

Xiaofei Wang

Email: [xiaofeiwang@fudan.edu.cn](mailto:xiaofeiwang@fudan.edu.cn) Tel: +86-21-31242526

Xin Yang

Email: [yangxin@fudan.edu.cn](mailto:yangxin@fudan.edu.cn) Tel: +86-21-31245272

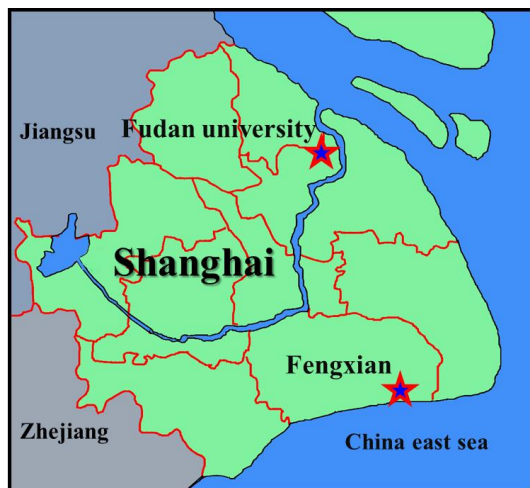

Fig.S1 the location of the Fengxian and Fudan university

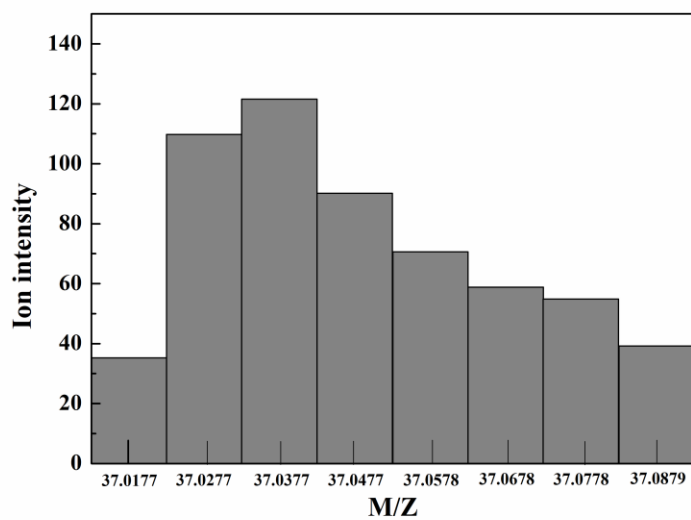

Fig.S2 the explanation of the m/z bin value in the single particle mass spectra

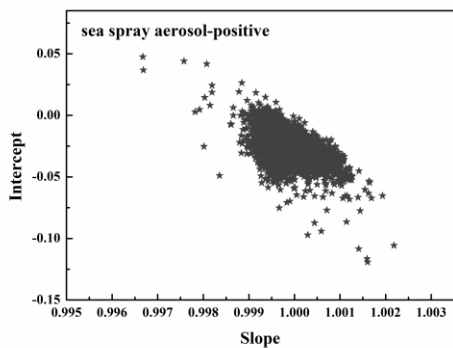

(a) positive ions

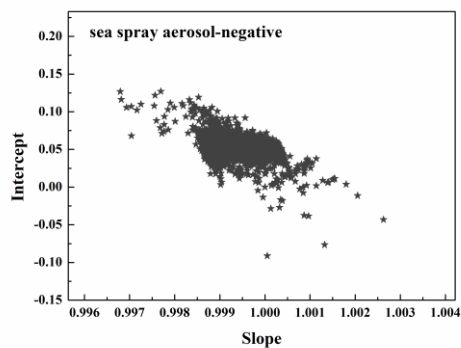

(b) negative ions

Fig.S3 slope-intercept of the sea spray aerosol calibration

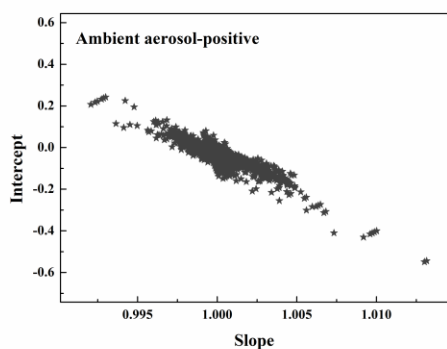

(a) positive ions

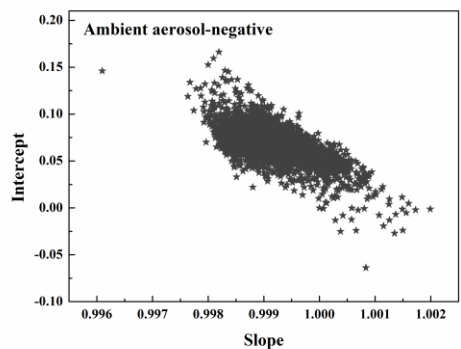

(b) negative ions

Fig.S4 slope-intercept of the ambient aerosol calibration

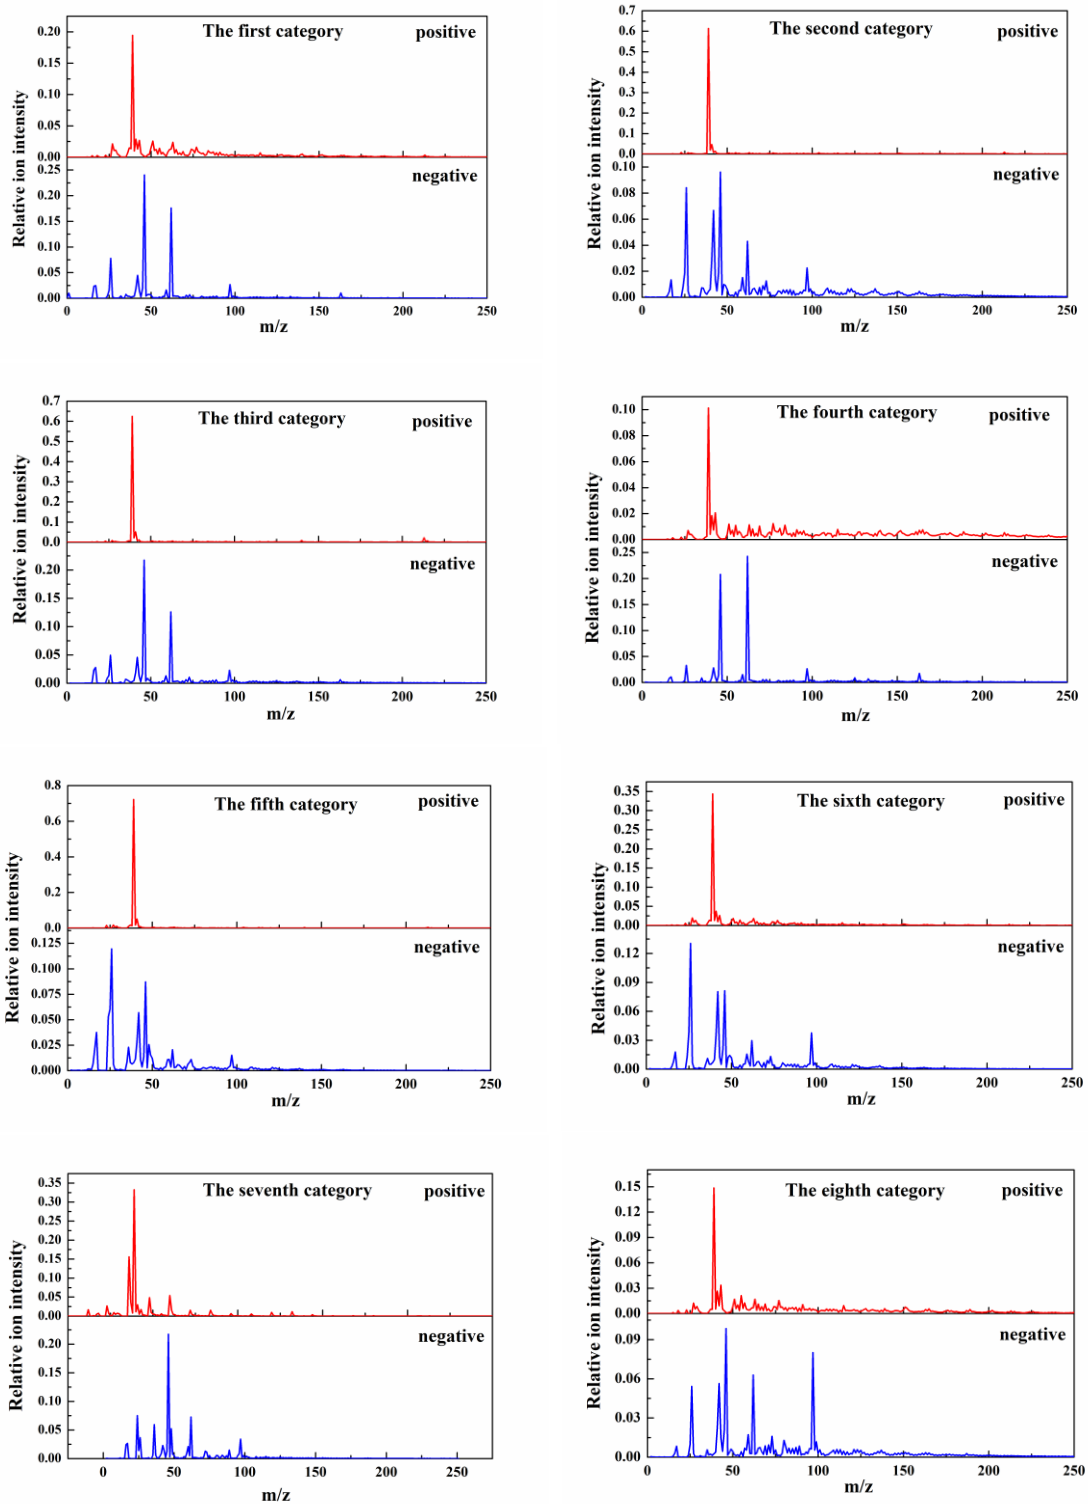

Figure.S5 Classification results of the LR-SPAMS by ART-2a

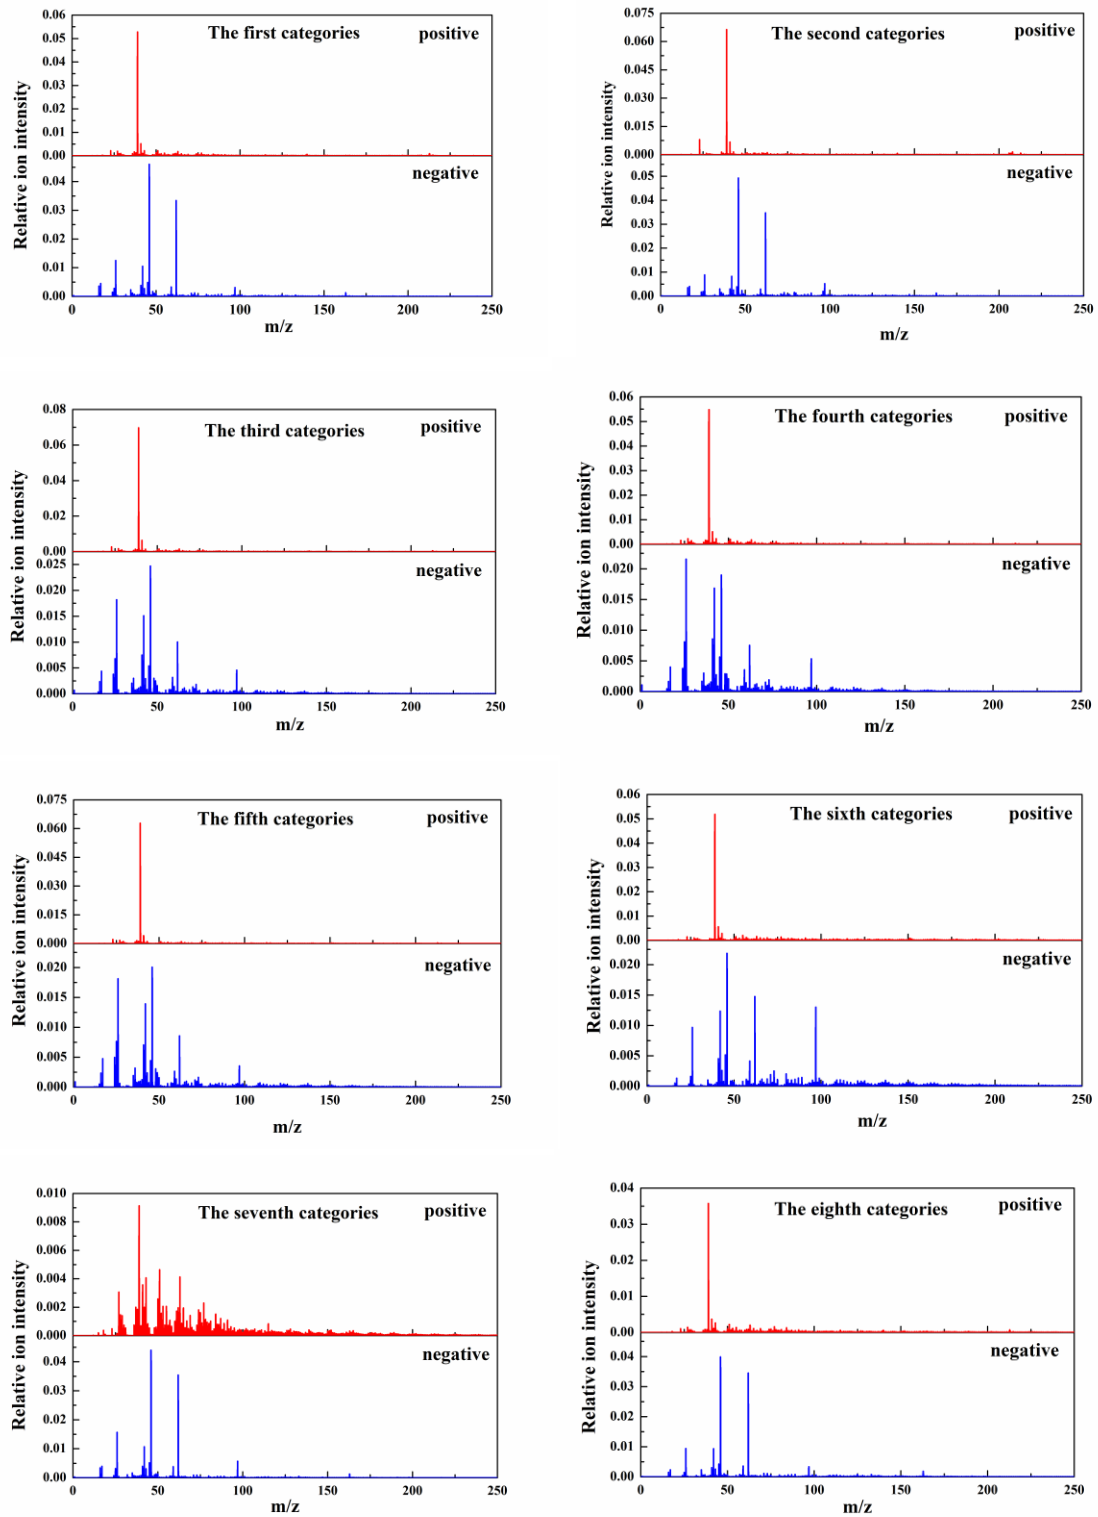

Figure.S6 Classification results of the HR-SPAMS by ART-2a

Table S1 deviation comparison between the averaged positive and negative mass spectra of calibration and non-calibration for sea spray aerosol

| positive species                | Theo (m/z) | Theo-bin(m/z) | Noncal-bin(m/z) | $\Delta m/z$ | Cal-bin(m/z) | $\Delta m/z$ | negative species               | Theo (m/z) | Theo-bin(m/z) | Noncal-bin(m/z) | $\Delta m/z$ | Cal-bin(m/z) | $\Delta m/z$ |
|---------------------------------|------------|---------------|-----------------|--------------|--------------|--------------|--------------------------------|------------|---------------|-----------------|--------------|--------------|--------------|
| Na <sup>+</sup>                 | 22.98977   | 22.993        | 23.0167         | 0.0237       | 22.993       | 0            | CN <sup>-</sup>                | 26.00307   | 25.9994       | 25.9658         | -            | 26.0078      | 0.0084       |
| Mg <sup>+</sup>                 | 23.98505   | 23.9829       | 24.0072         | 0.0243       | 23.9829      | 0            | Cl <sup>-</sup>                | 34.96885   | 34.9641       | 34.9349         | -            | 34.9641      | 0            |
| K <sup>+</sup>                  | 38.96371   | 38.9672       | 38.998          | 0.0288       | 38.9672      | 0            | Cl <sup>-</sup>                | 36.9659    | 36.9622       | 36.9321         | -            | 36.9622      | 0            |
| Na <sub>2</sub> Cl <sup>+</sup> | 80.94839   | 80.9438       | 80.9883         | 0.0445       | 80.9438      | 0            | CNO <sup>-</sup>               | 41.99799   | 41.9971       | 41.965          | -            | 41.9864      | 0.0107       |
| Na <sub>2</sub> Cl <sup>+</sup> | 82.94544   | 82.9421       | 82.9871         | 0.045        | 82.9421      | 0            | NaCl <sup>-</sup>              | 57.95862   | 57.9574       | 57.9448         | -            | 57.9574      | 0            |
| K <sub>2</sub> Cl <sup>+</sup>  | 112.89627  | 112.898       | 112.951         | 0.053        | 112.898      | 0            | MgCl <sub>3</sub> <sup>-</sup> | 128.89161  | 128.883       | 128.939         | 0.056        | 128.901      | 0.018        |
| K <sub>2</sub> Cl <sup>+</sup>  | 114.89332  | 114.885       | 114.938         | 0.053        | 114.885      | 0            | MgCl <sub>3</sub> <sup>-</sup> | 130.88866  | 130.894       | 130.932         | 0.038        | 130.894      | 0            |
|                                 |            |               |                 |              |              |              | MgCl <sub>3</sub> <sup>-</sup> | 132.88571  | 132.884       | 132.941         | 0.057        | 132.884      | 0            |

Table S2 deviation comparison between the averaged positive and negative mass spectra of calibration and non-calibration for ambient aerosol

| positive species            | Theo (m/z) | Theo-bin(m/z) | Noncal-bin(m/z) | $\Delta m/z$ | Cal-bin(m/z) | $\Delta m/z$ | negative species              | Theo (m/z) | Theo-bin(m/z) | Noncal-bin(m/z) | $\Delta m/z$ | Cal-bin(m/z) | $\Delta m/z$ |
|-----------------------------|------------|---------------|-----------------|--------------|--------------|--------------|-------------------------------|------------|---------------|-----------------|--------------|--------------|--------------|
| C <sup>+</sup>              | 12         | 11.9991       | 12.0105         | 0.0114       | 12.0048      | 0.0057       |                               |            |               |                 | -            |              |              |
| Na <sup>+</sup>             | 22.98977   | 22.993        | 23.0167         | 0.0237       | 22.993       | 0            | CN <sup>-</sup>               | 26.00307   | 25.9994       | 25.9658         | 0.0336       | 26.0078      | 0.0084       |
|                             |            |               |                 |              |              |              | Cl <sup>-</sup>               | 34.96885   | 34.9641       | 34.9349         | -            | 34.9641      | 0            |
|                             |            |               |                 |              |              |              |                               |            |               |                 | 0.0292       |              |              |
| C <sub>3</sub> <sup>+</sup> | 36         | 36.0023       | 36.032          | 0.0297       | 35.9925      | -            | NO <sub>2</sub> <sup>-</sup>  | 45.99291   | 45.9897       | 45.9673         | -            | 45.9897      | 0            |
|                             |            |               |                 |              |              | 0.0098       |                               |            |               |                 | 0.0224       |              |              |
| K <sup>+</sup>              | 38.9672    | 38.9672       | 38.998          | 0.0308       | 38.9672      | 0            | NO <sub>3</sub> <sup>+</sup>  | 61.98783   | 61.9938       | 61.9678         | -0.026       | 61.9808      | -0.013       |
| Fe <sup>+</sup>             | 55.93494   | 55.932        | 55.9813         | 0.0493       | 55.9443      | 0.0123       | SO <sub>4</sub> <sup>-</sup>  | 95.95175   | 95.9502       | 96.031          | 0.0808       | 95.9663      | 0.0161       |
| Pb <sup>+</sup>             | 207.97664  | 207.967       | 208.014         | 0.047        | 207.967      | 0            | HSO <sub>4</sub> <sup>-</sup> | 96.95958   | 96.9546       | 96.9709         | 0.0163       | 96.9546      | 0            |
| Pb <sup>+</sup>             | 205.97446  | 205.976       | 206.023         | 0.047        | 205.976      | 0            |                               |            |               |                 |              |              |              |
| Pb <sup>+</sup>             | 206.97589  | 206.97        | 207.018         | 0.048        | 206.994      | 0.024        |                               |            |               |                 |              |              |              |

Table S3 deviation comparison between the averaged positive and negative mass spectra of calibration and non-calibration for ambient aerosol with additional marker ions

| positive species            | Theo (m/z) | Theo-bin(m/z) | Noncal-bin(m/z) | $\Delta m/z$ | Cal-bin(m/z) | $\Delta m/z$ | negative species              | Theo (m/z) | Theo-bin(m/z) | Noncal-bin(m/z) | $\Delta m/z$ | Cal-bin(m/z) | $\Delta m/z$ |
|-----------------------------|------------|---------------|-----------------|--------------|--------------|--------------|-------------------------------|------------|---------------|-----------------|--------------|--------------|--------------|
| C <sup>+</sup>              | 12         | 11.9991       | 12.0105         | 0.0114       | 11.9877      | -            | CN <sup>-</sup>               | 26.00307   | 25.9994       | 25.9658         | -            | 26.0078      | 0.0084       |
| Na <sup>+</sup>             | 22.98977   | 22.993        | 23.0167         | 0.0237       | 22.993       | 0            | Cl <sup>-</sup>               | 34.96885   | 34.9641       | 34.9349         | -            | 34.9641      | 0            |
| C <sub>3</sub> <sup>+</sup> | 36         | 36.0023       | 36.032          | 0.0207       | 36.0023      | 0            | NO <sub>2</sub> <sup>-</sup>  | 45.99291   | 45.9897       | 45.9673         | -            | 45.9897      | 0            |
| K <sup>+</sup>              | 38.9672    | 38.9672       | 38.998          | 0.0308       | 38.9672      | 0            | NO <sub>3</sub> <sup>+</sup>  | 61.98783   | 61.9938       | 61.9678         | -0.026       | 61.9808      | -0.013       |
| Fe <sup>+</sup>             | 55.93494   | 55.932        | 55.9813         | 0.0493       | 55.9566      | 0.0246       | SO <sub>4</sub> <sup>-</sup>  | 95.95175   | 95.9502       | 96.0148         | 0.0646       | 95.9663      | 0.0161       |
| Pb <sup>+</sup>             | 207.97664  | 207.967       | 208.038         | 0.071        | 207.967      | 0            | HSO <sub>4</sub> <sup>-</sup> | 96.95958   | 96.9546       | 96.9709         | 0.0163       | 96.9546      | 0            |
| Pb <sup>+</sup>             | 205.97446  | 205.976       | 206.047         | 0.071        | 205.976      | 0            |                               |            |               |                 |              |              |              |
| Pb <sup>+</sup>             | 206.97589  | 206.97        | 207.041         | 0.071        | 206.994      | 0.024        |                               |            |               |                 |              |              |              |

Notes: Theo(m/z): Theoretical m/z value; Theo-bin(m/z): Theoretical m/z bin value;  
 Noncal-bin(m/z): Non-calibration m/z bin value. Cal bin(m/z): Calibration m/z bin value.
